# Supplementary material
Source: Preprints.org preprint supplement (doi:10.20944/preprints201912.0078.v1)
Supplement: Supplementary file 1 [file supplementary]

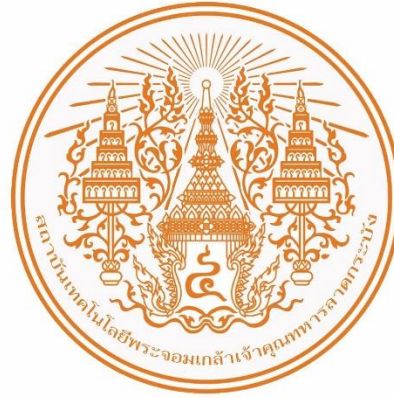

---

# Perceptions of Thai Aviation Students on Consumer Grade Virtual Reality Flight Experiences

---

**Presented By:** Jeremy Luisier

**Research Supervisors:** Soemsak Yooyen, Samart Deebhijarn

# CONTENTS

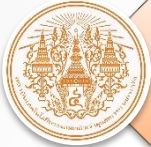

## Introduction

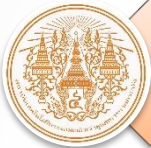

## Methods

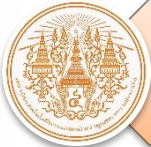

## Results and Discussion

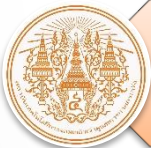

## Conclusion

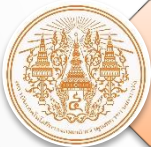

## References

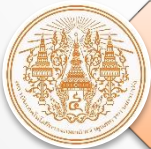

## Q & A

# Introduction

- Interested in Thai aviation student perspectives
- Consumer grade VR experiences (PS4/PSVR)
- Pre-existing flight software (Ultrawings)

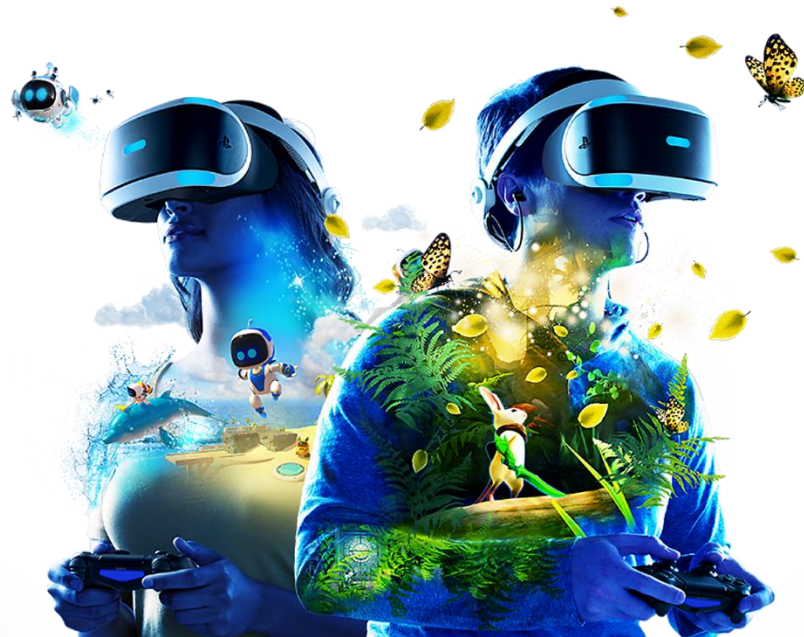

# Ultrawings Software

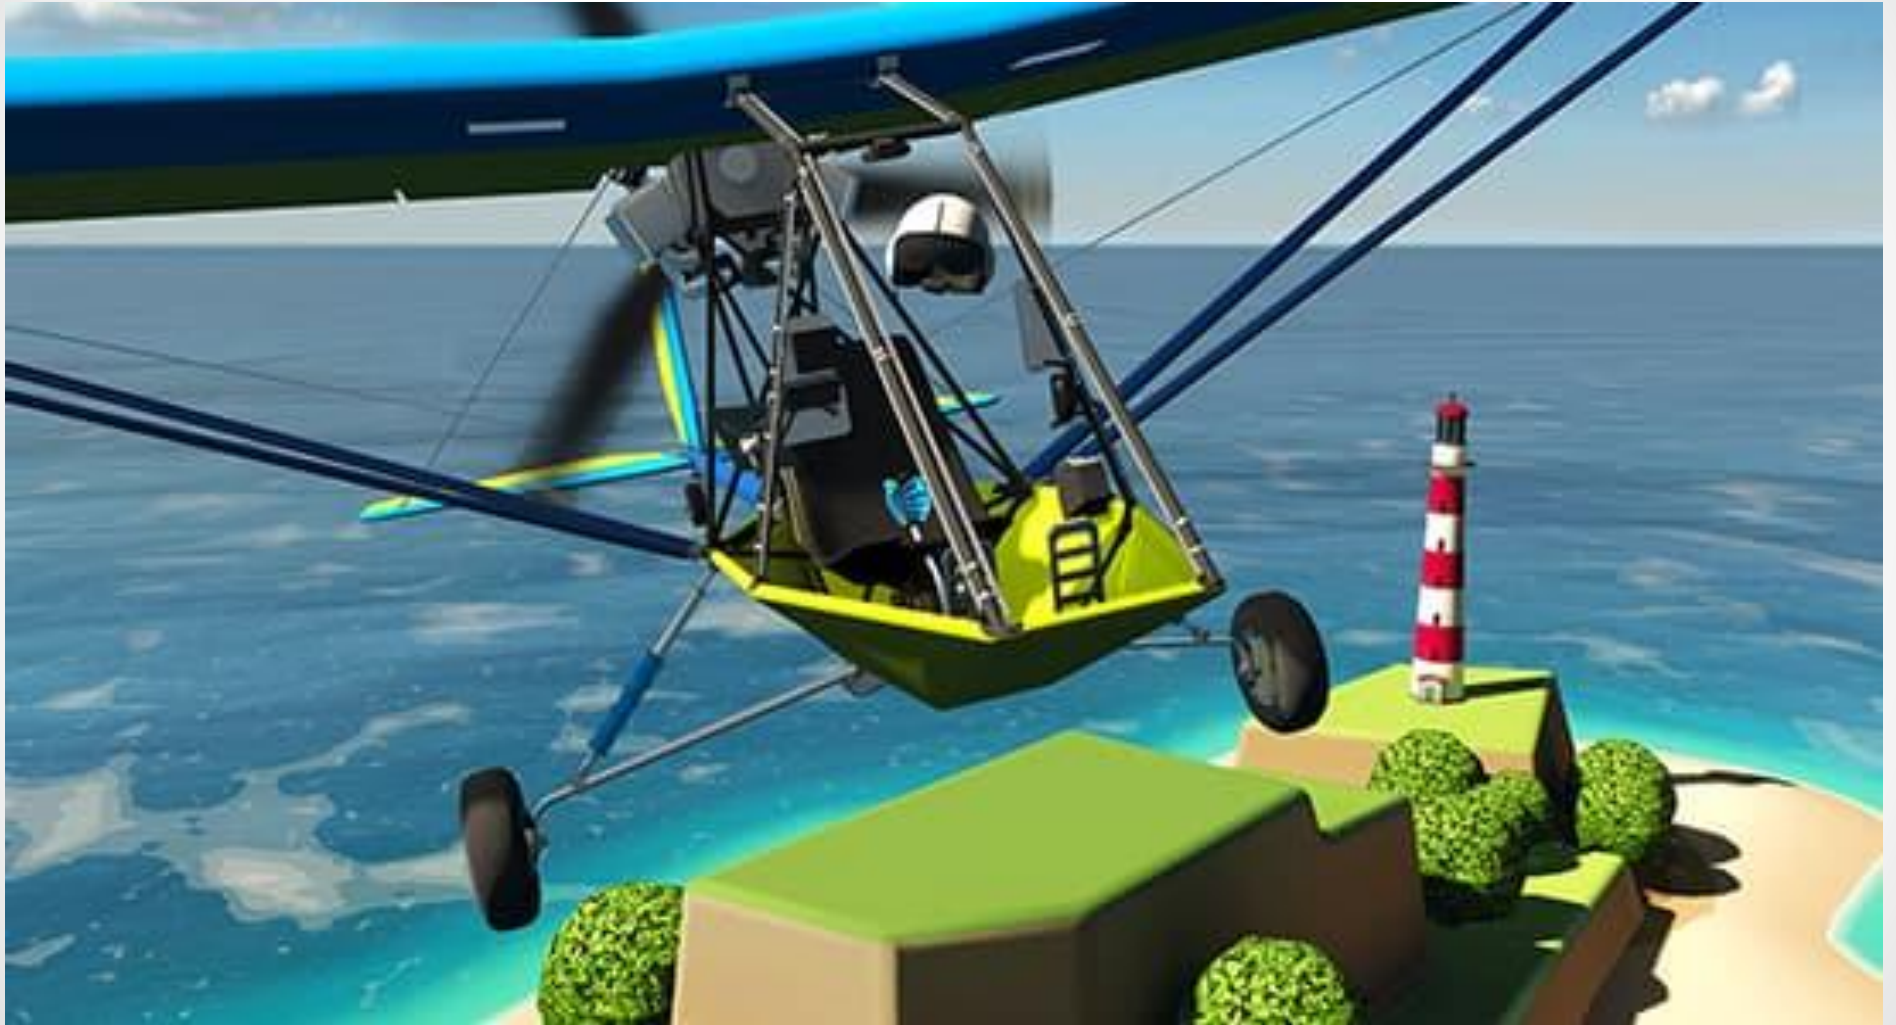

# Methods

- Three third year aeronautical engineering and commercial pilot program international students recruited from Ladkrabang district of Bangkok, Thailand.
- Disclosure briefing on study and VR safety
- 15 minute seated PS4/PSVR Ultrawings virtual reality flight experience
- In-depth qualitative interview follow-up
- Recorded via Otter application and field notes
- Analyzed with thematic coding procedure

# Results

Seven emergent themes from respondents:

- 1) Head mounted device (HMD)
- 2) Controls and Controllers (CC)
- 3) Plausibility Illusion (PsI)\*
- 4) Place Illusion (PI)\*
- 5) Embodiment Illusion (EI)\*
- 6) Academic Value (AV)
- 7) Entertainment Value (EV)

\*PsI, PI, and EI as defined by M. Slater, K. Kilteni, & R. Groten



# Discussion

| Pros                                                                                                                                                                                                                                                                                                                                                                                             | Cons                                                                                                                                                                                                                                                                                                                          |
|--------------------------------------------------------------------------------------------------------------------------------------------------------------------------------------------------------------------------------------------------------------------------------------------------------------------------------------------------------------------------------------------------|-------------------------------------------------------------------------------------------------------------------------------------------------------------------------------------------------------------------------------------------------------------------------------------------------------------------------------|
| <ul style="list-style-type: none"><li>• Simple and easy to use controls</li><li>• Plausible experience that “felt like flying”</li><li>• Inexpensive equipment setup</li><li>• Suitable for a classroom experience</li><li>• Preferable to a 3-monitor simulation setup</li><li>• Interesting and impressive experience overall</li><li>• Good predecessor to Redbird flight simulator</li></ul> | <ul style="list-style-type: none"><li>• Limited resolution and Screen Door Effect*</li><li>• Controls not realistic enough</li><li>• Lack of haptic feedback*</li><li>• Lack of virtual body (hands to push buttons)*</li><li>• Blacked out peripheral vision/delay*</li><li>• Cartoonish graphics/aesthetic style*</li></ul> |

\*Known limitations of the study

# Conclusion

Researchers recommend future research utilizing different hardware and software combinations to pursue higher resolution and reduced SDE, realistic physical or virtual controls, inclusion of virtual embodiment, improved haptic feedback, better peripheral vision without delay, and more realistic graphics.



# References

1. Redbird Flight Simulators, Inc. Available online: <https://simulators.redbirdflight.com/products/topic/simulators> (accessed on 18 November 2019).
2. Mel Slater. Place illusion and plausibility can lead to realistic behaviour in immersive virtual environments. *Phil. Trans. R. Soc. B* 2019, 364, 3549–3557. doi:10.1098/rstb.2009.0138
3. PlayStation 4 Specifications. Available online: <http://us.playstation.com/ps4/features/techspecs/index.htm> (accessed on 18 November 2019).
4. CUH-ZVR1 Full Specifications. Available online: <https://www.playstation.com/en-us/explore/playstation-vr/tips-and-specs/#cuh-zvr1> (accessed on 18 November 2019).
5. Ultrawings. Available online: <http://ultrawingsgame.com> (accessed on 18 November 2019).
6. VR Vision Group. Available online: <https://vrvisiongroup.com/what-is-the-screen-door-effect-why-does-it-happen/> (accessed 18 November 2019).
7. Minamizawa, Kouta & Prattichizzo, Domenico & Tachi, Susumu. Simplified design of haptic display by extending one-point kinesthetic feedback to multipoint tactile feedback. 2010 IEEE Haptics Symposium, *HAPTICS 2010*. 257 - 260. 10.1109/HAPTIC.2010.5444646.
8. K. Kiltner, R. Groten, & M. Slater. The Sense of Embodiment in Virtual Reality. *PRESENCE: Teleoperators and Virtual Environments* 2012, 21, 373-387.
9. Forbes Media, LLC. Available online: <https://www.forbes.com/sites/solrogers/2019/05/03/oculus-quest-the-best-standalone-vr-headset/#4904a0fd8ed8> (Accessed 18 November 2019).
10. HTC Corporation. Available online: <https://www.vive.com/us/product/vive-virtual-reality-system/> (accessed 18 November 2019).
11. Valve Corporation. Available online: <https://store.steampowered.com/app/639130/Ultrawings/> (accessed 18 November 2019).
12. Sony Interactive Entertainment. Available online: <https://blog.us.playstation.com/2019/10/08/an-update-on-next-gen-playstation-5-launches-holiday-2020/> (accessed 18 November 2019).
13. Mohammad Anuar Yusof, Abdul Malek Ya'acob, Mohd Azman Mohd Zaki, Zuriana Abdul Rahman, Nurul Husna Zainol Abidin, Irna Fazana Padil, Muhd Khudri Johari, Ismail A. Bakar, Hanif Faiq Mohd Hashim. Developing a Virtual Reality (VR) App for Theory of Flight & Control as a Teaching & Learning Aid. *IJITEE 2019. Volume-8 Issue-6S*. ISSN: 2278-3075.

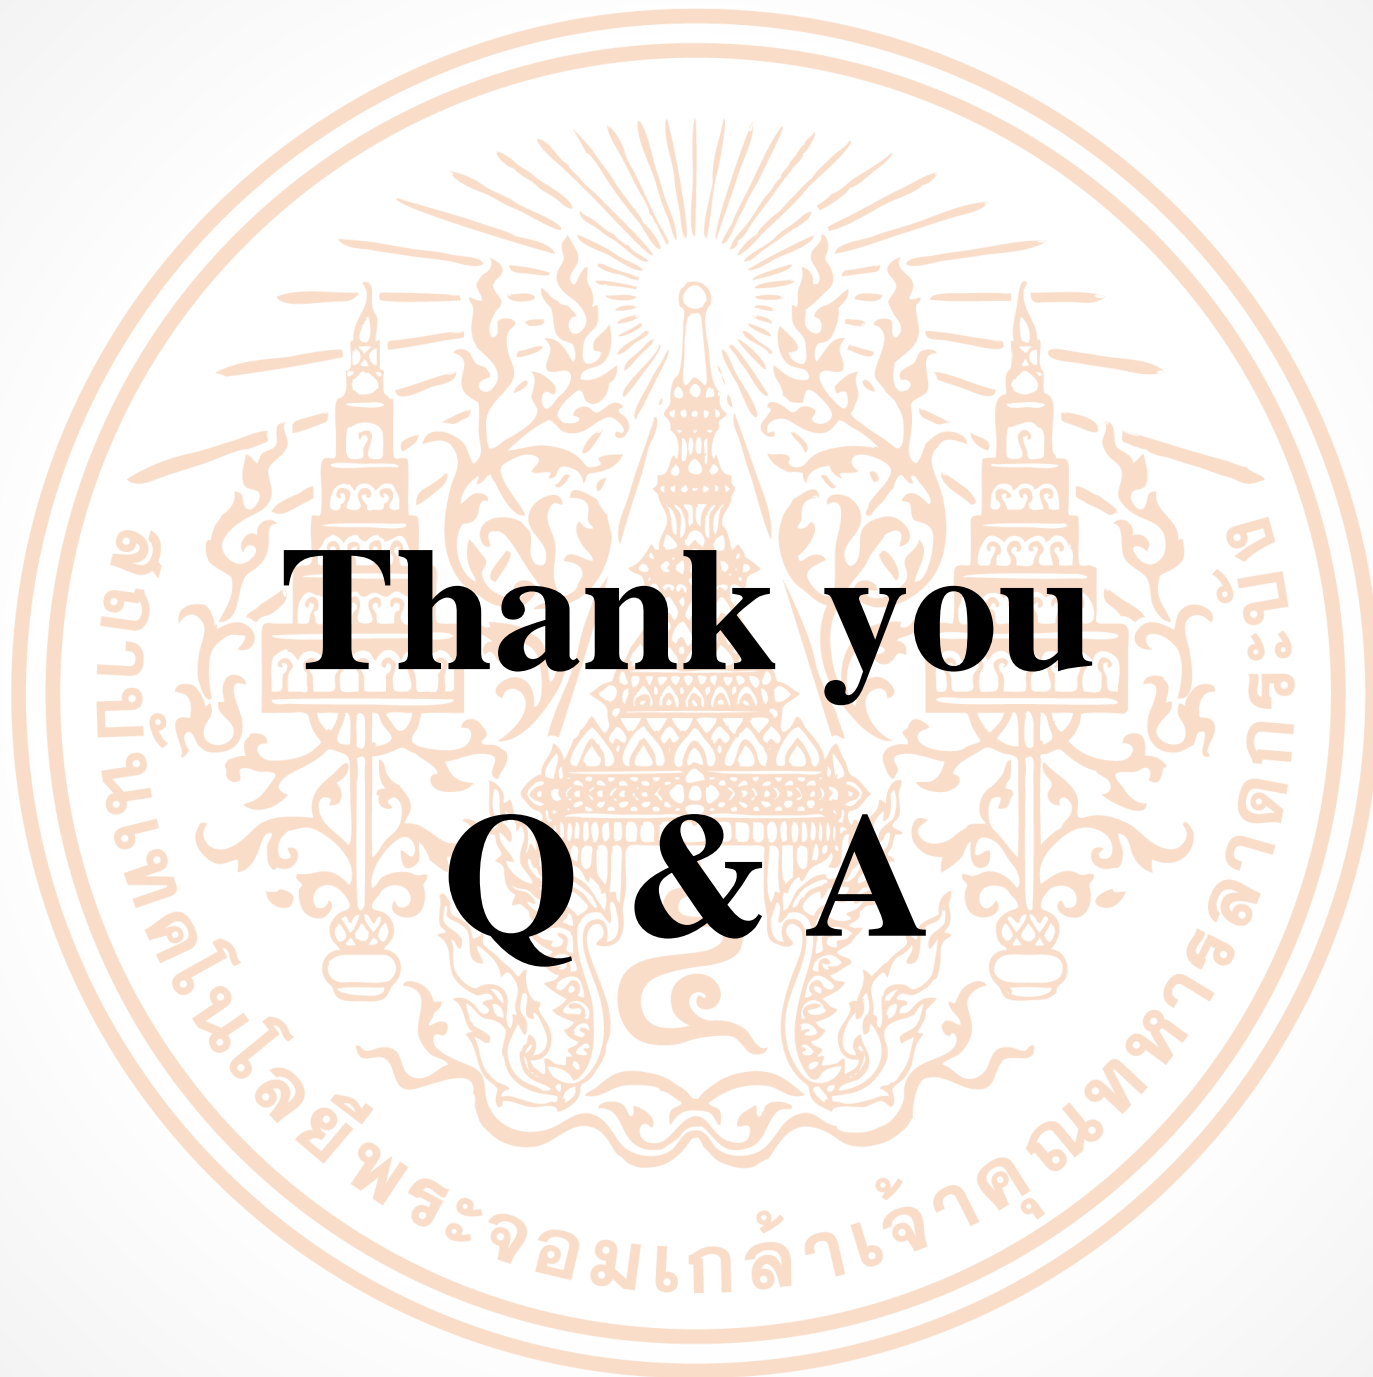

**Thank you**  
**Q & A**
